# Supplementary material for: Levetiracetam versus fosphenytoin as a second-line treatment after diazepam for adult convulsive status epilepticus: a multicentre non-inferiority randomised control trial
Source: PubMed Central journal article supplement (PMC9763167; doi:10.1136/jnnp-2022-329485), 2022-10-07
Supplement: jnnp-2022-329485supp001.pdf [file jnnp-2022-329485supp001.pdf]

**Supplemental Table.1 Basic characteristics in safety analysis set**

|                                            | <b>Group</b> | <b>FPHT</b>     | <b>LEV</b>      | <b>p</b>     |
|--------------------------------------------|--------------|-----------------|-----------------|--------------|
|                                            | <b>n</b>     | <b>82</b>       | <b>94</b>       | <b>value</b> |
| Age, year                                  |              | 65 ± 19         | 67 ± 16         | 0.32         |
| Male sex, (%)                              |              | 58 (70.7)       | 60 (63.8)       | 0.33         |
| Height, cm                                 |              | 163.0 ± 9.2     | 161.4 ± 9.8     | 0.26         |
| Body weight, kg                            |              | 60.4 ± 13.2     | 57.9 ± 12.4     | 0.19         |
| Past history of liver disease              |              | 3 (3.7)         | 3 (3.2)         | 0.87         |
| Serum creatinine on admission, mg/dL       |              | 0.87 (0.7, 1.1) | 0.86 (0.6, 1.1) | 0.55         |
| Type of status epilepticus                 |              |                 |                 | 0.43         |
| Tonic clonic seizure                       |              | 58 (70.7)       | 72 (76.6)       |              |
| Tonic seizure                              |              | 0 (0)           | 1 (1.1)         |              |
| Repeated partial seizure                   |              | 10 (12.2)       | 11 (11.7)       |              |
| Absence seizure                            |              | 0 (0)           | 1 (1.1)         |              |
| Complex partial seizure                    |              | 14 (17.1)       | 9 (9.6)         |              |
| Cause of status epilepticus                |              |                 |                 | 0.49         |
| Idiopathic seizure                         |              | 19 (23.2)       | 16 (17.0)       |              |
| Acute stroke                               |              | 7 (8.5)         | 12 (12.8)       |              |
| Old stroke                                 |              | 22 (26.8)       | 31 (33.0)       |              |
| Acute trauma                               |              | 2 (2.4)         | 2 (2.1)         |              |
| Old trauma                                 |              | 5 (6.1)         | 1 (1.1)         |              |
| Brain neoplasm                             |              | 11 (13.4)       | 12 (12.8)       |              |
| Others                                     |              | 16 (19.5)       | 20 (21.3)       |              |
| Seizure duration before treatment, minutes |              | 42.0 (30, 90)   | 60 (30, 80)     | 0.64         |

Continuous variables with the normal distribution are expressed as the mean ± standard deviation and are compared using Student's t-test. Non-parametric continuous variables are expressed as the median (interquartile range) and are compared using Mann–Whitney U test. Categorical variables are expressed as n (%) and compared using chi-squared tests. FPHT; fosphenytoin, LEV; levetiracetam
